# Supplementary material
Source: MDPI journal article supplement (https://www.mdpi.com/2073-445X/12/10/1865)
Supplement: s1 [file s1]

Archive with 2 entries (2 files):
- Table S1-LU Conversion elasticity.pdf
- Table S2-The conversion matrix .pdf
