# Supplementary material
Source: MDPI journal article supplement (https://www.mdpi.com/2073-445X/12/10/1865)
Supplement: s1 [file s1]

**Table S2.** The conversion matrix representing the allowed changes between different land-cover types.

|                                      | Urban areas | Industrial areas and infrastructures | Non-irrigated arable land | Irrigated arable land | Permanent crops | Grassland and pastures | Forests | Energy crops* | Other land covers |
|--------------------------------------|-------------|--------------------------------------|---------------------------|-----------------------|-----------------|------------------------|---------|---------------|-------------------|
| Urban areas                          | 1           | 0                                    | 0                         | 0                     | 0               | 0                      | 0       | 0             | 0                 |
| Industrial areas and infrastructures | 0           | 1                                    | 0                         | 0                     | 0               | 0                      | 0       | 0             | 0                 |
| Non-irrigated arable land            | 1           | 1                                    | 1                         | 1                     | 1               | 1                      | 0       | 1             | 0                 |
| Irrigated arable land                | 1           | 1                                    | 1                         | 1                     | 1               | 1                      | 0       | 1             | 0                 |
| Permanent crops                      | 1           | 1                                    | 1                         | 1                     | 1               | 1                      | 0       | 1             | 0                 |
| Grassland and pastures               | 1           | 1                                    | 1                         | 1                     | 1               | 1                      | 0       | 1             | 0                 |
| Forests                              | 1           | 1                                    | 1                         | 1                     | 1               | 1                      | 1       | 1             | 0                 |
| Energy crops*                        | 1           | 1                                    | 1                         | 1                     | 1               | 1                      | 0       | 1             | 0                 |
| Other land covers                    | 0           | 0                                    | 0                         | 0                     | 0               | 0                      | 0       | 0             | 1                 |

\*: the asterisk "\*" indicates that the LU class is foreseen (and has to be taken into account) only in one scenario: the Energy crops scenario (ECs).
