# Supplementary material
Source: MDPI journal article supplement (https://www.mdpi.com/2073-445X/12/10/1865)
Supplement: s1 [file s1]

**Table S1.** Land-use map classes, CLC classes correspondence and Conversion elasticity.

| <b>Land cover</b>                    | <b>Corresponding CLC classes</b> | <b>Description</b>                                                                                                      | <b>Conversion elasticity</b> |
|--------------------------------------|----------------------------------|-------------------------------------------------------------------------------------------------------------------------|------------------------------|
| Urban areas                          | 1.1, 1.4                         | Residential buildings, leisure facilities and non-agricultural vegetated areas.                                         | 1                            |
| Industrial areas and infrastructures | 1.2, 1.3                         | Industrial and commercial buildings, transportation facilities, quarries and dumps.                                     | 1                            |
| Non-irrigated arable land            | 2.1.1                            | Non-irrigated arable land.                                                                                              | 0.2                          |
| Irrigated arable land                | 2.1.2                            | Irrigated arable land.                                                                                                  | 0.3                          |
| Permanent crops                      | 2.2, 2.4                         | Olive groves, vineyards, orchards, agroforestry crops, associated crops, protected crops and complex cultural patterns. | 0.5                          |
| Grassland and pastures               | 2.3, 3.2, 3.3.3, 3.3.4           | Predominantly grass-vegetated open spaces, possibly including sparse shrubs, trees or bare ground spots.                | 0.1                          |
| Forests                              | 3.1                              | Forests.                                                                                                                | 0.8                          |
| Energy crops*                        | -                                | Crops for bioremediation of polluted soils experimented by ECOREMED project, not included in CLC classification.        | 0.3                          |
| Other land covers                    | 3.3.1, 3.3.2, 4, 5               | Beaches, bare ground, wetlands and water bodies.                                                                        | 1                            |
